# Supplementary material for: MicroRNA expression in extracellular vesicles as a novel blood-based biomarker for Alzheimer’s disease
Source: PubMed Central journal article supplement — Alzheimers Dement. Author manuscript; Available in PMC 2024 Dec 22. (PMC11663460; doi:10.1002/alz.13055), 2023-04-18
Supplement: NIHMS2040438-supplement-Tables.pdf [file NIHMS2040438-supplement-Tables.pdf]

**Supplementary Table 1. Major AD risk genes and their target analysis for 8 specific miRNAs.**

| Major AD Risk genes                                                 | miRNAs                                                                           |
|---------------------------------------------------------------------|----------------------------------------------------------------------------------|
| Beta-secretase 1 (BACE1)                                            | miR-9-5p, miR-107, miR-135b-5p, miR-210-3p, miR-29a-5p, miR-106b-5p, miR-132-5p  |
| Amyloid precursor protein (APP)                                     | miR-9-5p, miR-106b-5p, miR-107, miR-9-5p, miR-29a-5p, miR-135b-5p, miR-210-3p    |
| Bleomycin hydrolase (BLMH)                                          | miR-107, miR-9-5p, miR-106b-5p, miR-125b-5p, miR-135b-5p, miR-210-3p             |
| Nitric oxide synthase 3 (NOS3)                                      | miR-107, miR-210-3p                                                              |
| PAX-interacting protein 1 (PAXIP1)                                  | miR-9-5p, miR-106b-5p, miR-125b-5p, miR-135b-5p, miR-210-3p                      |
| Plasminogen activator urokinase (PLAU)                              | miR-125b-5p, miR-135b-5p, miR-210-3p                                             |
| Presenilin-1 (PSEN1)                                                | miR-9-5p, miR-135b-5p, miR-16b-5p, miR-107, miR-125b-5p, miR-210-3p              |
| Presenilin-2 (PSEN2)                                                | miR-107, miR-125b-5p, miR-135b-5p                                                |
| CUGBP, elav-like family member 1 (CELF1)                            | miR-210-3p, miR-9-5p, miR-106b-5p, miR-107, miR-125b-5p, miR-135b-5p             |
| Fermitin family homolog-2 (FERMT2)                                  | miR-107, miR-135b-5p, miR-29a-5p, miR-106b-5p, miR-132-5p, miR-210-3p            |
| Amyloid beta precursor protein binding family B member 2 (APBB2)    | miR-106b-5p, miR-9-5p, miR-29a-5p, miR-107, miR-125b-5p, miR-135b-5p, miR-210-3p |
| Myocyte enhancer factor 2C (MEF2C)                                  | miR-135b-5p, miR-9-5p, miR-210-3p, miR-29a-5p, miR-106b-5p, miR-107, miR-125b-5p |
| CD2-associated protein (CD2AP)                                      | miR-29a-5p, miR-9-5p, miR-106b-5p, miR-107, miR-125b-5p, miR-135b-5p, miR-210-3p |
| ADAM metalloproteinase with thrombospondin type 1 motif 4 (ADAMTS4) | miR-125b-5p                                                                      |
| Complement receptor type 1 (CR1)                                    | miR-9-5p, miR-29a-5p, miR-106b-5p, miR-107, miR-210-3p                           |
| Bridging Integrator 1 (BIN1)                                        | miR-9-5p, miR-210-3p                                                             |
| HESX homeobox 1 (HESX1)                                             | miR-106b-5p                                                                      |
| Heparan sulfate-glucosamine 3-sulfotransferase 1 (HS3ST1)           | miR-9-5p, miR-106b-5p, miR-125b-5p, miR-210-3p                                   |
| Major histocompatibility complex, class II, DR beta 1 (HLA-DRB1)    | miR-125b-5p, miR-210-3p                                                          |
| Triggering receptor expressed on myeloid cells 2 (TREM2)            | miR-210-3p                                                                       |
| EPH receptor A1 (EPHA1)                                             | miR-107, miR-125b-5p                                                             |
| Contactin associated protein 2 (CNTNAP2)                            | miR-9-5p, miR-106b-5p, miR-107, miR-125b-5p, miR-135b-5p                         |
| Enoyl-CoA hydratase domain containing 3 (ECHDC3)                    | miR-135b-5p                                                                      |
| Membrane spanning 4-domains A6A (MS4A6A)                            | miR-125b-5p                                                                      |
| Phosphatidylinositol binding clathrin assembly protein (PICALM)     | miR-9-5p, miR-106b-5p, miR-107, miR-210-3p                                       |
| Sortilin related receptor 1 (SORL1)                                 | miR-106b-5p, miR-135b-5p, miR-9-5p, miR-107, miR-125b-5p, miR-210-3p             |
| Solute carrier family 24 member 4 (SLC24A4)                         | miR-132-5p, miR-9-5p, miR-29a-5p, miR-16b-5p, miR-107, miR-135b-5p               |
| A disintegrin and metalloproteinase domain 10 (ADAM10)              | miR-9-5p, miR-29a-5p, miR-106b-5p, miR-107, miR-125b-5p, miR-135b-5p, miR-210-3p |
| Aph-1 homolog B, gamma-secretase subunit (APH1B)                    | miR-9-5p, miR-107, miR-125b-5p                                                   |
| ABI family member 3 (ABI3)                                          | miR-107                                                                          |
| Alpha kinase 2 (ALPK2)                                              | miR-125b-5p, miR-135b-5p                                                         |
| ATP binding cassette subfamily A member 7 (ABCA7)                   | miR-135b-5p                                                                      |
| Cluster of differentiation 33 (CD33)                                | miR-9-5p                                                                         |
| Angiotensin I converting enzyme (ACE)                               | miR-107, miR-125b-5p, miR-135b-5p, miR-210-3p                                    |
| Desmoglein 2 (DSG2)                                                 | miR-9-5p, miR-106b-5p, miR-107, miR-125b-5p, miR-132-5p, miR-135b-5p, miR-210-3p |
| Clusterin (CLU)                                                     | miR-107, miR-125b-5p, miR-210-3p                                                 |
| Inositol polyphosphate-5-phosphatase D (INPP5D)                     | miR-210-3p, miR-29a-5p                                                           |
| Protein tyrosine kinase 2 beta (PTK2B)                              | miR-9-5p, miR-125b-5p, miR-132-5p, miR-135b-5p, miR-210-3p                       |
